# Supplementary material
Source: PubMed Central journal article supplement (PMC3920839)
Supplement: Supp_Table2.pdf [file Supp_Table2.pdf]

## Supplementary Data

SUPPLEMENTARY TABLE S2. PRIMER SEQUENCES USED FOR QUANTITATIVE POLYMERASE CHAIN REACTION

| <i>Primer</i> | <i>Sequence</i>        |
|---------------|------------------------|
| NURR1-F       | ATTAGCATACAGGTCCAACCC  |
| NURR1-R       | TGGAGGAGAATTCAACAATGG  |
| VMAT-F        | TGGATTTCGTC AATGATGCCT |
| VMAT-R        | CAGAAGGACCTATAGCATACCC |
| TH-F          | GTGCTAAACCTGCTCTTCTC   |
| TH-R          | GCTTCAAACGTCTCAAACAC   |
| MSX1-F        | AGACGCAGGTGAAGATATGG   |
| MSX1-R        | ATCTTCAGCTTCTCCAGCTC   |
| EN1-F         | GCCAAGATCAAGAAAGCCAC   |
| EN1-R         | TACTCGCTCTCGTCTTTGTC   |
| GIRK2-F       | CATGATTGAGTGAAGCCACC   |
| GIRK2-R       | AGGACGTTAGTCATGGATTCTG |
| OTX2-F        | GTACCCAGACATCTTCATGC   |
| OTX2-R        | GATTCTTAAACCATACTGCACC |
| FOX1A-F       | GGAACACCACTACGCCTTCAAC |
| FOX1A-R       | AGTGCATCACCTGTTCTAGGC  |
| NGN2-F        | CAAGCTCACCAAGATCGAGACC |
| NGN2-R        | AGCAACACTGCCTCGGAGAAGA |
| OCT4-F        | AGCGAACCAAGTATCGAGAAC  |
| OCT4-R        | TTACAGAACCACACTCGGAC   |
| NANOG-F       | TGAACCTCAGCTACAAACAG   |
| NANOG-R       | TGGTGGTAGGAAGAGTAAAG   |
| PAX6-F        | TGTCCAACGGATGTGTGAGT   |
| PAX6-R        | TTCCCAAGCAAAGATGGAC    |
| GAPDH-F       | AGAAGGCTGGGGCTCATTTG   |
| GAPDH-R       | AGGGGCCATCCACAGTCTTC   |
