# Supplementary material
Source: PubMed Central journal article supplement (PMC3920839)
Supplement: Supp_Table3.pdf [file Supp_Table3.pdf]

SUPPLEMENTARY TABLE S3. GENE HYBRIDIZATION INTENSITY DISTRIBUTION IN EACH SAMPLE

| <i>Signal intensity</i> | <i>ESC_H14</i> |          | <i>NSC_H14</i> |          | <i>DA1_H14</i> |          | <i>DA2_H14</i> |          |
|-------------------------|----------------|----------|----------------|----------|----------------|----------|----------------|----------|
|                         | <i>Number</i>  | <i>%</i> | <i>Number</i>  | <i>%</i> | <i>Number</i>  | <i>%</i> | <i>Number</i>  | <i>%</i> |
| >=10,000                | 125            | 0.94     | 431            | 3.24     | 523            | 3.94     | 531            | 4.00     |
| >=5,000                 | 88             | 0.66     | 605            | 4.55     | 633            | 4.76     | 637            | 4.79     |
| >=1,000                 | 847            | 6.38     | 2,875          | 21.64    | 3,467          | 26.10    | 3,468          | 26.10    |
| >=500                   | 883            | 6.65     | 1,299          | 9.78     | 2,216          | 16.68    | 2,220          | 16.71    |
| >=100                   | 3,243          | 24.41    | 2,243          | 16.88    | 5,265          | 39.63    | 5,289          | 39.81    |
| >=30                    | 2,444          | 18.40    | 1,346          | 10.13    | 5,383          | 40.52    | 5,371          | 40.43    |
| <30                     | 5,656          | 42.57    | 4,487          | 33.77    | 7,693          | 57.90    | 7,640          | 57.50    |
| Total (%)               | 13,286         | 100      | 13,286         | 100      | 13,286         | 100      | 13,286         | 100      |

  

| <i>Signal intensity</i> | <i>ESC_H1</i> |          | <i>NSC_H1</i> |          | <i>DA1_H1</i> |          | <i>DA2_H1</i> |          |
|-------------------------|---------------|----------|---------------|----------|---------------|----------|---------------|----------|
|                         | <i>Number</i> | <i>%</i> | <i>Number</i> | <i>%</i> | <i>Number</i> | <i>%</i> | <i>Number</i> | <i>%</i> |
| >=10,000                | 374           | 2.81     | 456           | 3.43     | 375           | 2.82     | 389           | 2.93     |
| >=5,000                 | 479           | 3.61     | 552           | 4.15     | 482           | 3.63     | 552           | 4.15     |
| >=1,000                 | 2,886         | 21.72    | 2,731         | 20.56    | 2,722         | 20.49    | 2,884         | 21.71    |
| >=500                   | 1,556         | 11.71    | 1,274         | 9.59     | 1,352         | 10.18    | 1,361         | 10.24    |
| >=100                   | 2,076         | 15.63    | 2,340         | 17.61    | 2,408         | 18.12    | 2,446         | 18.41    |
| >=30                    | 1,654         | 12.45    | 1,417         | 10.67    | 1,459         | 10.98    | 1,415         | 10.65    |
| <30                     | 3,631         | 27.33    | 4,517         | 34.00    | 4,488         | 33.78    | 4,239         | 31.91    |
| Total (%)               | 13,286        | 100      | 13,286        | 100      | 13,286        | 100.00   | 13,286        | 100.00   |

  

| <i>Signal intensity</i> | <i>iPSC_MR31</i> |          | <i>NSC_MR31</i> |          | <i>DA1_MR31</i> |          | <i>DA2_MR31</i> |          |
|-------------------------|------------------|----------|-----------------|----------|-----------------|----------|-----------------|----------|
|                         | <i>Number</i>    | <i>%</i> | <i>Number</i>   | <i>%</i> | <i>Number</i>   | <i>%</i> | <i>Number</i>   | <i>%</i> |
| >=10,000                | 411              | 3.09     | 476             | 3.58     | 529             | 3.98     | 408             | 3.07     |
| >=5,000                 | 511              | 3.85     | 604             | 4.55     | 569             | 4.28     | 512             | 3.85     |
| >=1,000                 | 2,588            | 19.48    | 2,820           | 21.23    | 2,847           | 21.43    | 2,714           | 20.43    |
| >=500                   | 1,358            | 10.22    | 1,313           | 9.88     | 1,282           | 9.65     | 1,403           | 10.56    |
| >=100                   | 2,828            | 21.29    | 2,415           | 18.18    | 2,369           | 17.83    | 2,683           | 20.19    |
| >=30                    | 1,745            | 13.13    | 1,475           | 11.10    | 1,509           | 11.36    | 1,587           | 11.94    |
| <30                     | 3,845            | 28.94    | 4,183           | 31.48    | 4,181           | 31.47    | 3,979           | 29.95    |
| Total (%)               | 13,286           | 100      | 13,286          | 100      | 13,286          | 100      | 13,286          | 100      |

  

| <i>Signal intensity</i> | <i>iPSC_MMW2</i> |          | <i>NSC_MMW2</i> |          | <i>DA1_MMW2</i> |          | <i>DA2_MMW2</i> |          |
|-------------------------|------------------|----------|-----------------|----------|-----------------|----------|-----------------|----------|
|                         | <i>Number</i>    | <i>%</i> | <i>Number</i>   | <i>%</i> | <i>Number</i>   | <i>%</i> | <i>Number</i>   | <i>%</i> |
| >=10,000                | 500              | 3.76     | 496             | 3.73     | 514             | 3.87     | 425             | 3.20     |
| >=5,000                 | 562              | 4.23     | 594             | 4.47     | 616             | 4.64     | 525             | 3.95     |
| >=1,000                 | 2,698            | 20.31    | 2,765           | 20.81    | 2,785           | 20.96    | 2,689           | 20.24    |
| >=500                   | 1,360            | 10.24    | 1,268           | 9.54     | 1,259           | 9.48     | 1,383           | 10.41    |
| >=100                   | 2,599            | 19.56    | 2,450           | 18.44    | 2,411           | 18.15    | 2,666           | 20.07    |
| >=30                    | 1,708            | 12.86    | 1,522           | 11.46    | 1,576           | 11.86    | 1,585           | 11.93    |
| <30                     | 3,859            | 29.05    | 4,191           | 31.54    | 4,125           | 31.05    | 4,013           | 30.20    |
| Total (%)               | 13,286           | 100      | 13,286          | 100      | 13,286          | 100      | 13,286          | 100      |

iPSC, induced pluripotent stem cell; ESC, embryonic stem cell; NSC, neural stem cell; DA1, dopaminergic precursors; DA2, dopaminergic neurons.
