# Supplementary material
Source: PubMed Central journal article supplement (PMC3920839)
Supplement: Supp_Table4.pdf [file Supp_Table4.pdf]

SUPPLEMENTARY TABLE S4. CORRELATION COEFFICIENTS AMONG SELECTED SAMPLES

| Variable  | H14_ESC | H14_NSC | H14_DA1 | H14_DA2 | H9_ESC  | H9_NSC  | H9_DA1  | H9_DA2  | H1_ESC  | H1_NSC  | H1_DA1  | H1_DA2  | H1_ESC | H1_NSC | H1_DA1 | H1_DA2 |
|-----------|---------|---------|---------|---------|---------|---------|---------|---------|---------|---------|---------|---------|--------|--------|--------|--------|
| H14_ESC   | 1       | 0.85758 | 0.79585 | 0.80552 | 0.76441 | 0.80592 | 0.85165 | 0.85374 | 0.87777 | 0.85217 | 0.86175 | 0.84289 |        |        |        |        |
| H14_NSC   | 0.85758 | 1       | 0.84641 | 0.8616  | 0.80963 | 0.87357 | 0.91894 | 0.89246 | 0.8846  | 0.92095 | 0.92213 | 0.89207 |        |        |        |        |
| H14_DA2   | 0.79585 | 0.84641 | 1       | 0.90536 | 0.76378 | 0.81691 | 0.84466 | 0.87581 | 0.83584 | 0.84803 | 0.85453 | 0.88083 |        |        |        |        |
| H14_DA1   | 0.80552 | 0.8616  | 0.90536 | 1       | 0.76266 | 0.83012 | 0.86459 | 0.88013 | 0.83644 | 0.85777 | 0.87091 | 0.88097 |        |        |        |        |
| H9_ESC    | 0.76441 | 0.80963 | 0.80536 | 0.76266 | 1       | 0.8973  | 0.84689 | 0.75082 | 0.81177 | 0.79692 | 0.79353 | 0.77761 |        |        |        |        |
| H9_NSC    | 0.80592 | 0.87357 | 0.81691 | 0.83012 | 0.8973  | 1       | 0.94072 | 0.86347 | 0.83666 | 0.85871 | 0.86305 | 0.8423  |        |        |        |        |
| H9_DA1    | 0.85165 | 0.91894 | 0.84466 | 0.86459 | 0.84689 | 0.94072 | 1       | 0.90779 | 0.8863  | 0.91739 | 0.92645 | 0.90388 |        |        |        |        |
| H9_DA2    | 0.85374 | 0.89246 | 0.87581 | 0.88013 | 0.75082 | 0.86347 | 0.90779 | 1       | 0.88025 | 0.89535 | 0.90996 | 0.92456 |        |        |        |        |
| H1_ESC    | 0.87777 | 0.8846  | 0.83584 | 0.83644 | 0.81177 | 0.83666 | 0.8863  | 0.88025 | 1       | 0.90032 | 0.89312 | 0.8832  |        |        |        |        |
| H1_NSC    | 0.85217 | 0.92095 | 0.84803 | 0.85777 | 0.79692 | 0.85871 | 0.91739 | 0.89535 | 0.90032 | 1       | 0.92142 | 0.90032 |        |        |        |        |
| H1_DA1    | 0.86175 | 0.92213 | 0.85453 | 0.87091 | 0.79353 | 0.86305 | 0.92645 | 0.90996 | 0.89312 | 0.92142 | 1       | 0.91524 |        |        |        |        |
| H1_DA2    | 0.84289 | 0.89207 | 0.88083 | 0.88097 | 0.77761 | 0.8423  | 0.90388 | 0.92456 | 0.8832  | 0.90032 | 0.91524 | 1       |        |        |        |        |
| MMW2_DA1  | 0.80613 | 0.87224 | 0.81433 | 0.8261  | 0.86009 | 0.8423  | 0.8517  | 0.83342 | 0.83979 | 0.85933 | 0.86101 | 0.83906 |        |        |        |        |
| MMW2_DA2  | 0.78947 | 0.83332 | 0.84982 | 0.83953 | 0.82578 | 0.88976 | 0.82854 | 0.85947 | 0.82285 | 0.82799 | 0.84302 | 0.86307 |        |        |        |        |
| MMW2_NSC  | 0.80169 | 0.87585 | 0.81352 | 0.82355 | 0.86663 | 0.91866 | 0.85396 | 0.83053 | 0.84069 | 0.86031 | 0.86038 | 0.83739 |        |        |        |        |
| MMW2_iPSC | 0.79989 | 0.83611 | 0.78342 | 0.78373 | 0.9091  | 0.88053 | 0.81347 | 0.79551 | 0.84048 | 0.82368 | 0.82422 | 0.80447 |        |        |        |        |
| MR31_DA1  | 0.80112 | 0.87405 | 0.82502 | 0.83516 | 0.85452 | 0.91878 | 0.8595  | 0.84445 | 0.83658 | 0.859   | 0.86586 | 0.84882 |        |        |        |        |
| MR31_DA2  | 0.78053 | 0.8517  | 0.82854 | 0.83516 | 0.85452 | 0.87942 | 0.81888 | 0.85479 | 0.82188 | 0.82177 | 0.83482 | 0.86062 |        |        |        |        |
| MR31_NSC  | 0.80015 | 0.86918 | 0.81574 | 0.82794 | 0.8468  | 0.91674 | 0.85782 | 0.84181 | 0.83317 | 0.85456 | 0.8636  | 0.84482 |        |        |        |        |
| MR31_iPSC | 0.80044 | 0.82944 | 0.7899  | 0.785   | 0.90415 | 0.8739  | 0.81189 | 0.79707 | 0.84446 | 0.82181 | 0.86129 | 0.80417 |        |        |        |        |
| H14_ESC   | 0.80613 | 0.85758 | 0.78947 | 0.80169 | 0.76441 | 0.79989 | 0.80112 | 0.80112 | 0.78053 | 0.80015 | 0.86175 | 0.80044 |        |        |        |        |
| H14_NSC   | 0.87224 | 0.83332 | 0.83332 | 0.87585 | 0.80963 | 0.83611 | 0.87405 | 0.87405 | 0.82705 | 0.86918 | 0.92213 | 0.82944 |        |        |        |        |
| H14_DA2   | 0.81433 | 0.84982 | 0.84982 | 0.81352 | 0.76378 | 0.78342 | 0.82502 | 0.82502 | 0.85501 | 0.81574 | 0.85453 | 0.7899  |        |        |        |        |
| H14_DA1   | 0.8261  | 0.83953 | 0.83953 | 0.82355 | 0.76266 | 0.78373 | 0.83516 | 0.83516 | 0.83835 | 0.82794 | 0.87091 | 0.785   |        |        |        |        |
| H9_ESC    | 0.86009 | 0.82578 | 0.82578 | 0.86663 | 0.76266 | 0.9091  | 0.85452 | 0.85452 | 0.82213 | 0.8468  | 0.79353 | 0.90415 |        |        |        |        |
| H9_NSC    | 0.92073 | 0.88976 | 0.88976 | 0.91866 | 0.84689 | 0.8423  | 0.90388 | 0.90388 | 0.82188 | 0.91674 | 0.86305 | 0.8739  |        |        |        |        |
| H9_DA1    | 0.8517  | 0.82854 | 0.82854 | 0.85396 | 0.8468  | 0.81347 | 0.8595  | 0.8595  | 0.81888 | 0.85782 | 0.92645 | 0.81189 |        |        |        |        |
| H9_DA2    | 0.83342 | 0.85947 | 0.85947 | 0.83053 | 0.8468  | 0.79551 | 0.84445 | 0.84445 | 0.85479 | 0.84181 | 0.90996 | 0.79707 |        |        |        |        |
| H1_ESC    | 0.83979 | 0.82285 | 0.82285 | 0.84069 | 0.81177 | 0.84048 | 0.83658 | 0.83658 | 0.82188 | 0.83317 | 0.86305 | 0.84446 |        |        |        |        |
| H1_NSC    | 0.85933 | 0.82799 | 0.82799 | 0.86031 | 0.82578 | 0.82368 | 0.859   | 0.859   | 0.82177 | 0.85456 | 0.90996 | 0.82181 |        |        |        |        |
| H1_DA1    | 0.86101 | 0.84302 | 0.84302 | 0.86038 | 0.82422 | 0.82422 | 0.86586 | 0.86586 | 0.83482 | 0.8636  | 0.92456 | 0.82129 |        |        |        |        |
| H1_DA2    | 0.83906 | 0.86307 | 0.86307 | 0.83739 | 0.80447 | 0.80447 | 0.84882 | 0.84882 | 0.86062 | 0.84482 | 0.86062 | 0.80417 |        |        |        |        |
| MMW2_DA1  | 0.88829 | 0.88829 | 0.88829 | 0.88478 | 0.8872  | 0.8872  | 0.92135 | 0.92135 | 0.88368 | 0.91369 | 0.87799 | 0.87799 |        |        |        |        |
| MMW2_DA2  | 0.88829 | 0.88829 | 0.88829 | 0.88478 | 0.8872  | 0.8872  | 0.92135 | 0.92135 | 0.88368 | 0.91369 | 0.87799 | 0.87799 |        |        |        |        |
| MMW2_NSC  | 0.92654 | 0.92654 | 0.92654 | 0.92654 | 0.92654 | 0.92654 | 0.92654 | 0.92654 | 0.92399 | 0.91653 | 0.92326 | 0.92326 |        |        |        |        |
| MMW2_iPSC | 0.8872  | 0.8872  | 0.8872  | 0.88783 | 0.88783 | 0.88783 | 0.88783 | 0.88783 | 0.88783 | 0.88783 | 0.88783 | 0.88783 |        |        |        |        |
| MR31_DA1  | 0.92135 | 0.92135 | 0.92135 | 0.9201  | 0.9201  | 0.9201  | 0.9201  | 0.9201  | 0.87846 | 0.87476 | 0.92199 | 0.87478 |        |        |        |        |
| MR31_DA2  | 0.88368 | 0.92399 | 0.92399 | 0.87846 | 0.87846 | 0.87846 | 0.8866  | 0.8866  | 0.87846 | 0.87476 | 0.92199 | 0.87478 |        |        |        |        |
| MR31_NSC  | 0.91369 | 0.89559 | 0.89559 | 0.91653 | 0.91653 | 0.91653 | 0.92199 | 0.92199 | 0.84759 | 0.84759 | 0.88031 | 0.84934 |        |        |        |        |
| MR31_iPSC | 0.87799 | 0.85777 | 0.85777 | 0.8803  | 0.8803  | 0.8803  | 0.87478 | 0.87478 | 0.8866  | 0.8866  | 0.88031 | 0.87214 |        |        |        |        |
