# Supplementary material
Source: PubMed Central journal article supplement (PMC3920839)
Supplement: Supp_Table5.pdf [file Supp_Table5.pdf]

SUPPLEMENTARY TABLE S5. THE EXPRESSION OF PD-RELATED AND MITOCHONDRIAL GENES IN THE REPRESENTATIVE LINE H9

| <i>Gene ID</i>   | <i>ESC_H9</i> | <i>NSC_H9</i> | <i>DA1_H9</i> | <i>DA2_H9</i> |
|------------------|---------------|---------------|---------------|---------------|
| PD-related genes |               |               |               |               |
| ACMSD            | 137           | 102           | 16            | 1             |
| ATP13A2 (PARK9)  | 466           | 339           | 385           | 868           |
| BST1             | 44            | 1             | 6             | 5             |
| FGF20            | 44            | 36            | 42            | 45            |
| GAK              | 6,026         | 3,813         | 2,153         | 1,779         |
| GBA              | 492           | 1,118         | 586           | 409           |
| GNPMB            | 60            | 5             | 1             | 6             |
| HIP1R            | 45            | 232           | 100           | 424           |
| LRRK2 (PARK8)    | 6             | 32            | 15            | 22            |
| MAPT             | 45            | 637           | 491           | 11,594        |
| MCCC1            | 1,102         | 1,865         | 1,963         | 1,275         |
| MED13            | 114           | 61            | 66            | 46            |
| DJ-1 (PARK7)     | 8,557         | 9,533         | 13,761        | 13,541        |
| PDXK             | 3,627         | 2,194         | 1,349         | 2,370         |
| PINK1 (PARK6)    | 197           | 412           | 738           | 1,430         |
| PM20D1           | 1             | 3             | 6             | 26            |
| RAB25            | 1,237         | 25            | 1             | 1             |
| SETD1A           | 1,191         | 1,213         | 1,751         | 950           |
| SNCA (PARK1)     | 495           | 511           | 453           | 1,749         |
| SNCAIP           | 242           | 1,526         | 2,293         | 3,872         |
| STK39            | 1,983         | 4,920         | 4,906         | 4,813         |
| UCHL1 (PARK5)    | 7,780         | 3,060         | 6,041         | 16,776        |
| PARK2            | 33            | 38            | 48            | 66            |
| GIGYF2 (PARK11)  | 18            | 25            | 76            | 17            |
| HTRA2 (PARK13)   | 289           | 605           | 878           | 644           |
| PLA2G6 (PARK14)  | 50            | 55            | 62            | 57            |
| FBXO7 (PARK 15)  | 1,236         | 1,682         | 1,488         | 909           |
| VPS35 (PARK17)   | 2,753         | 5,754         | 4,428         | 4,545         |
| EIF4G1 (PARK18)  | 5,958         | 4,281         | 2,011         | 1,338         |
| MC1R             | 139           | 193           | 289           | 263           |
| ADH1C            | 1             | 1             | 4             | 1             |
| Mitochondrial    |               |               |               |               |
| AIFM2            | 68            | 9             | 1             | 1             |
| AIP              | 861           | 992           | 987           | 1,234         |
| ATP12A           | 55            | 1             | 22            | 22            |
| ATP4A            | 5             | 1             | 1             | 1             |
| ATP4B            | 16            | 19            | 19            | 13            |
| ATP5A1           | 36,369        | 29,133        | 28,649        | 30,739        |
| ATP5B            | 53,857        | 33,932        | 37,817        | 33,638        |
| ATP5C1           |               |               |               |               |
| ATP5F1           | 11,321        | 14,358        | 14,756        | 12,517        |
| ATP5G1           | 8,953         | 4,641         | 2,734         | 3,285         |
| ATP5G2           | 11,821        | 17,075        | 23,156        | 12,667        |
| ATP5G3           | 501           | 380           | 131           | 182           |
| ATP5H            | 19,680        | 15,857        | 16,683        | 14,741        |
| ATP5I            | 26,389        | 19,519        | 10,523        | 12,667        |
| ATP5J            | 17,299        | 16,472        | 13,522        | 13,186        |
| ATP5J2           | 10,295        | 8,999         | 9,635         | 7,794         |
| ATP5L            | 19,673        | 19,035        | 19,120        | 18,020        |
| ATP5O            | 12,908        | 14,218        | 17,692        | 15,950        |
| ATP6V0A2         | 748           | 778           | 532           | 261           |
| ATP6V0D2         | 5             | 28            | 14            | 37            |
| ATP6V1C2         | 1             | 10            | 20            | 12            |
| ATP6V1E2         | 186           | 152           | 92            | 134           |
| ATP6V1G3         | 25            | 10            | 3             | 2             |
| BAK1             | 278           | 202           | 78            | 4             |
| BBC3             | 5             | 1             | 435           | 479           |
| BCL2             | 228           | 1,244         | 1,102         | 939           |
| BCL2L1           | 4,773         | 4,271         | 5,579         | 6,366         |

(continued)

SUPPLEMENTARY TABLE S5. (CONTINUED)

| <i>Gene ID</i> | <i>ESC_H9</i> | <i>NSC_H9</i> | <i>DA1_H9</i> | <i>DA2_H9</i> |
|----------------|---------------|---------------|---------------|---------------|
| BCS1L          | 600           | 679           | 757           | 716           |
| BID            | 769           | 275           | 377           | 220           |
| BNIP3          | 2,341         | 2,781         | 1,459         | 10,439        |
| CDKN2A         | 63            | 10            | 52            | 27            |
| COX10          | 2,943         | 1,883         | 1,539         | 1,082         |
| COX18          | 43            | 61            | 8             | 14            |
| COX4I1         | 40,998        | 23,241        | 15,767        | 16,079        |
| COX4I2         | 1             | 1             | 1             | 1             |
| COX5A          | 14,391        | 11,150        | 16,791        | 18,732        |
| COX5B          | 8,759         | 7,639         | 14,549        | 11,929        |
| COX6A1         | 5,941         | 5,613         | 6,214         | 6,458         |
| COX6A2         | 1             | 1             | 1             | 21            |
| COX6B1         | 12,396        | 15,739        | 14,499        | 14,468        |
| COX6B2         | 28            | 4             | 26            | 10            |
| COX6C          | 14,399        | 15,686        | 14,917        | 14,155        |
| COX7A2         | 21,346        | 18,909        | 15,210        | 20,676        |
| COX7B          | 5,607         | 4,022         | 5,875         | 6,538         |
| COX8A          | 17,136        | 14,137        | 18,481        | 14,705        |
| COX8C          | 10            | 12            | 1             | 1             |
| CPT1B          | 226           | 604           | 384           | 338           |
| CPT2           | 1,416         | 1,284         | 1,000         | 659           |
| CYC1           | 11,242        | 6,841         | 4,015         | 3,541         |
| DNM1L          | 1,667         | 2,204         | 1,490         | 1,513         |
| FIS1           | 2,077         | 2,097         | 2,157         | 1,941         |
| FXC1           | 550           | 846           | 354           | 352           |
| GRPEL1         | 1,747         | 1,121         | 504           | 773           |
| HSP90AA1       | 40,766        | 34,953        | 26,483        | 21,424        |
| HSPD1          | 28,308        | 19,578        | 15,226        | 10,825        |
| IMMP1L         | 14            | 98            | 44            | 78            |
| IMMP2L         | 637           | 661           | 438           | 431           |
| LHPP           | 1,067         | 399           | 616           | 852           |
| LRPPRC         | 2,223         | 2,251         | 1,624         | 1,925         |
| MFN1           | 220           | 155           | 207           | 220           |
| MFN2           | 1,019         | 1,805         | 1,154         | 1,095         |
| MIPEP          | 344           | 412           | 430           | 170           |
| MPV17          | 1,402         | 1,807         | 1,363         | 648           |
| MSTO1          | 365           | 351           | 834           | 472           |
| MTX2           | 4,055         | 2,866         | 2,968         | 4,008         |
| NDUFA1         | 16,403        | 15,444        | 9,001         | 8,745         |
| NDUFA10        | 1,036         | 868           | 1,541         | 1,556         |
| NDUFA11        | 7,605         | 8,686         | 8,999         | 6,963         |
| NDUFA2         | 1,323         | 8,164         | 7,195         | 7,784         |
| NDUFA3         | 8,227         | 9,619         | 10,260        | 8,727         |
| NDUFA4         | 27,546        | 27,338        | 21,476        | 23,521        |
| NDUFA5         | 19            | 1             | 57            | 106           |
| NDUFA6         | 571           | 6,137         | 2,285         | 2,767         |
| NDUFA7         | 2,962         | 2,839         | 1,816         | 1,378         |
| NDUFA8         | 5,646         | 4,954         | 5,289         | 4,759         |
| NDUFAB1        | 13,097        | 9,683         | 10,213        | 8,857         |
| NDUFB10        | 5,959         | 4,206         | 6,200         | 4,964         |
| NDUFB2         | 7,866         | 8,718         | 14,738        | 11,218        |
| NDUFB3         | 5,292         | 7,014         | 11,691        | 10,262        |
| NDUFB4         | 54            | 7             | 6             | 43            |
| NDUFB5         | 10,276        | 10,619        | 8,103         | 8,151         |
| NDUFB6         | 5,269         | 4,885         | 3,387         | 3,640         |
| NDUFB7         | 5,639         | 5,181         | 5,994         | 4,515         |
| NDUFB8         | 16,787        | 15,196        | 11,872        | 11,102        |
| NDUFB9         | 1,005         | 6,559         | 3,676         | 3,347         |
| NDUFC1         | 1,314         | 1,694         | 1,779         | 1,459         |
| NDUFC2         | 194           | 139           | 231           | 92            |
| NDUFS1         | 193           | 161           | 71            | 92            |
| NDUFS2         | 198           | 183           | 293           | 343           |

(continued)

SUPPLEMENTARY TABLE S5. (CONTINUED)

| Gene ID  | ESC_H9 | NSC_H9 | DA1_H9 | DA2_H9 |
|----------|--------|--------|--------|--------|
| NDUFS3   | 8,744  | 7,250  | 7,580  | 6,725  |
| NDUFS4   | 4,105  | 4,427  | 6,980  | 7,114  |
| NDUFS5   | 22,262 | 15,496 | 13,875 | 10,406 |
| NDUFS6   | 9      | 17     | 1      | 2      |
| NDUFS7   | 4,506  | 3,024  | 2,404  | 2,621  |
| NDUFS8   | 9,763  | 7,659  | 10,758 | 9,803  |
| NDUFV1   | 3,392  | 2,990  | 2,880  | 3,216  |
| NDUFV2   | 7,390  | 6,691  | 9,225  | 6,964  |
| NDUFV3   | 195    | 130    | 85     | 50     |
| NEFL     | 43     | 1,319  | 328    | 1,344  |
| OPA1     | 1,376  | 1,519  | 1,071  | 1,520  |
| OXA1L    | 2,417  | 2,240  | 3,258  | 2,353  |
| PMAIP1   | 7,359  | 395    | 315    | 88     |
| PPA1     | 12,942 | 11,275 | 10,026 | 10,265 |
| PPA2     | 2,468  | 6,878  | 4,934  | 16,498 |
| RHOT1    | 1,602  | 2,201  | 1,958  | 3,039  |
| RHOT2    | 1,534  | 1,461  | 1,993  | 1,202  |
| SDHA     | 2,187  | 2,412  | 1,749  | 1,709  |
| SDHB     | 6,803  | 3,710  | 2,527  | 2,233  |
| SDHC     | 2,425  | 2,239  | 1,149  | 1,023  |
| SDHD     | 2,872  | 1,075  | 1,156  | 659    |
| SFN      | 48     | 1      | 1      | 1      |
| SH3GLB1  | 1,898  | 1,582  | 1,201  | 1,295  |
| SLC25A1  | 1,628  | 2,935  | 1,853  | 1,686  |
| SLC25A10 | 246    | 136    | 203    | 180    |
| SLC25A12 | 248    | 216    | 482    | 412    |
| SLC25A13 | 2,154  | 1,960  | 3,031  | 1,587  |
| SLC25A14 | 692    | 1,227  | 1,826  | 3,580  |
| SLC25A15 | 995    | 1,172  | 1,141  | 826    |
| SLC25A16 | 114    | 28     | 102    | 98     |
| SLC25A17 | 459    | 234    | 185    | 190    |
| SLC25A19 | 591    | 81     | 216    | 153    |
| SLC25A2  | 1      | 1      | 1      | 1      |
| SLC25A20 | 291    | 473    | 480    | 371    |
| SLC25A21 | 288    | 230    | 63     | 40     |
| SLC25A22 | 1,974  | 1,107  | 594    | 778    |
| SLC25A23 | 2,884  | 3,625  | 2,791  | 2,321  |
| SLC25A24 | 490    | 547    | 176    | 51     |
| SLC25A25 | 1,746  | 1,561  | 896    | 1,743  |
| SLC25A27 | 48     | 86     | 71     | 188    |
| SLC25A3  | 21,292 | 19,554 | 20,592 | 12,340 |
| SLC25A30 | 1      | 19     | 1      | 1      |
| SLC25A31 | 1      | 13     | 24     | 1      |
| SLC25A37 | 353    | 654    | 364    | 176    |
| SLC25A4  | 7,785  | 3,548  | 4,069  | 9,399  |
| SLC25A5  | 19,525 | 13,969 | 23,000 | 19,701 |
| SOD1     | 17,008 | 16,834 | 17,034 | 16,040 |
| SOD2     | 1,047  | 743    | 830    | 588    |
| STARD3   | 72     | 105    | 373    | 278    |
| TAZ      | 280    | 415    | 492    | 306    |
| TIMM10   | 3,564  | 2,525  | 1,031  | 876    |
| TIMM17A  | 25     | 68     | 70     | 60     |
| TIMM17B  | 1,350  | 888    | 1,043  | 1,069  |
| TIMM22   | 2,760  | 2,250  | 1,755  | 1,292  |
| TIMM23   | 12,443 | 10,166 | 11,458 | 7,920  |
| TIMM44   | 1,247  | 696    | 449    | 241    |
| TIMM50   | 1      | 1      | 1      | 1      |
| TIMM8A   | 661    | 371    | 346    | 219    |
| TIMM8B   | 332    | 296    | 699    | 552    |
| TIMM9    | 578    | 551    | 1,635  | 1,258  |
| TOMM20   | 7,615  | 9,061  | 6,217  | 7,046  |
| TOMM22   | 2,016  | 2,060  | 3,147  | 2,210  |

SUPPLEMENTARY TABLE S5. (CONTINUED)

| Gene ID  | ESC_H9 | NSC_H9 | DA1_H9 | DA2_H9 |
|----------|--------|--------|--------|--------|
| TOMM34   | 2,042  | 1,675  | 1,730  | 909    |
| TOMM40   | 12,325 | 6,422  | 3,645  | 2,524  |
| TOMM40L  | 181    | 266    | 518    | 640    |
| TOMM70A  | 5,150  | 4,919  | 3,292  | 4,256  |
| TP53     | 553    | 1,760  | 2,388  | 672    |
| TSPO     | 2,350  | 268    | 356    | 190    |
| UCP1     | 1      | 1      | 14     | 11     |
| UCP2     | 122    | 235    | 195    | 47     |
| UCP3     | 32     | 27     | 89     | 55     |
| UQCRC1   | 2,362  | 2,411  | 4,809  | 3,194  |
| UQCRC2   | 2,075  | 1,677  | 2,919  | 3,438  |
| UQCRCF51 | 16,172 | 15,368 | 9,445  | 9,332  |
| UQCRH    | 23,875 | 19,542 | 15,442 | 12,430 |
| UQCRQ    | 15,194 | 15,245 | 13,932 | 12,583 |
| UXT      | 4,072  | 4,666  | 8,507  | 7,546  |

PD, Parkinson's disease.

(continued)
